# Supplementary material for: Phytochemicals inhibit migration of triple negative breast cancer cells by targeting kinase signaling
Source: PubMed Central journal article supplement (PMC6941316; doi:10.1186/s12885-019-6479-2), 2020-01-02
Supplement: 12885_2019_6479_MOESM1_ESM.pdf [file 12885_2019_6479_MOESM1_ESM.pdf]

## Supplementary Information

**Supplementary Table S1.** Coordinates of protein kinases in the phospho-kinase dot blot array.

| Membrane/Coordinate | Target/Control  |             |                       |
|---------------------|-----------------|-------------|-----------------------|
| A-A1, A2            | Reference spot  | A-D5, D6    | Lck                   |
| A-A3, A4            | p38alpha        | A-D7, D8    | STAT2                 |
| A-A5, A6            | ERK1/2          | A-D9, D10   | STAT5a                |
| A-A7, A8            | JNK1/2/3        | B-D11, D-12 | p70 S6 Kinase         |
| A-A9, A10           | GSK-3alpha/beta | B-D13, D14  | RSK1/2/3              |
| B-A13, A14          | p53             | B-D15, D16  | Enos                  |
| B-A17, A18          | Reference spot  | A-E1, E2    | Fyn                   |
| A-B3, B4            | EGFR            | A-E3, E4    | Yes                   |
| A-B5, B6            | MSK1/2          | A-E5, E6    | Fgr                   |
| A-B7, B8            | AMPK alpha1     | A-E7, E8    | STAT6                 |
| A-B9, B10           | Akt1/2/3        | A-E9, E-10  | STAT5b                |
| B-B11, B12          | Akt1/2/3        | B-E11, E12  | STAT3                 |
| B-B13, B14          | p53             | B-E13, E14  | p27                   |
| A-C1, C2            | TOR             | B-E15, E16  | PLC- $\gamma$ 1       |
| A-C3, C4            | CREB            | A-F1, F2    | Hck                   |
| A-C5, C6            | HSP27           | A-F3, F4    | Chk-2                 |
| A-C7, C8            | AMPK alpha2     | A-F5, F6    | FAK                   |
| A-C9, C10           | beta-catenin    | A-F7, F8    | PDGFR $\beta$         |
| B-C11, C12          | p70 S6 Kinase   | A-F9, F10   | STAT5a/b              |
| B-C13, C14          | p53             | B-F11, F12  | STAT3                 |
| B-C15, C16          | c-Jun           | B-F13, F14  | WNK1                  |
| A-D1, D2            | Src             | B-F15, F16  | PYK2                  |
| A-D3, D4            | Lyn             | B-G1, G2    | Reference spot        |
|                     |                 | B-G3, G4    | PRAS40                |
|                     |                 | A-G9, G10   | PBS(Negative Control) |
|                     |                 | B-G11, G12  | HSP60                 |
|                     |                 | B-G17, G18  | PBS(Negative Control) |

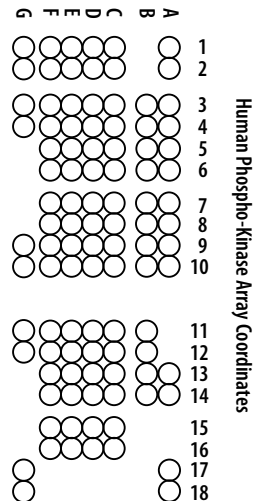

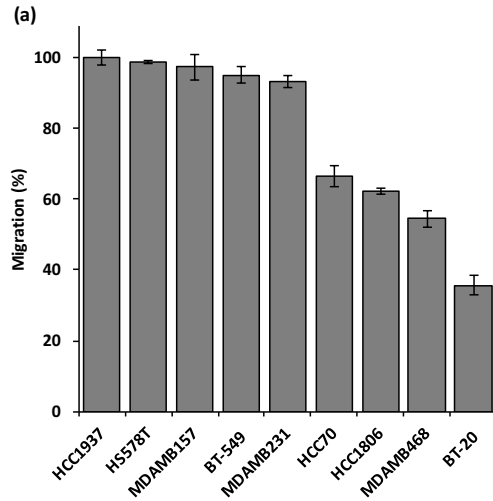

(b)

| TNBC subtype            | Cell line  | Mutations                             | Ethnicity        |
|-------------------------|------------|---------------------------------------|------------------|
| <b>Basal Like</b>       |            |                                       |                  |
| BL1                     | HCC1937    | BRCA1; TP53; MAPK13; MDC1             | Caucasian        |
| BL1                     | MDA-MB-468 | PTEN; RB1; SMAD4; TP53                | African-American |
| BL2                     | HCC70      | PTEN; TP53                            | African-American |
| BL2                     | HCC1806    | CDKN2A; TP53; UTX                     | African-American |
| <b>Mesenchymal like</b> |            |                                       |                  |
| M                       | BT-549     | PTEN; RB1; TP53                       | Caucasian        |
| MSL                     | H5578T     | CDKN2A; HRAS; TP53                    | Caucasian        |
| MSL                     | MDA-MB-157 | NF1; TP53                             | African-American |
| MSL                     | MDA-MB-231 | BRAF; CDKN2A; KRAS; NF2; TP53; PDGFRA | Caucasian        |
| <b>Unclassified</b>     |            |                                       |                  |
| -                       | BT20       | CDKN2A; PIK3CA; TP53                  | Caucasian        |

Source: J. Kao et al., PLoS One 4 (2009) e6146

**Supplementary Figure S1.** (a) Migration of TNBC cells into the cell-excluded gap after 48 hrs without any treatment. (b) Subtypes of TNBC cell lines and their major mutations.

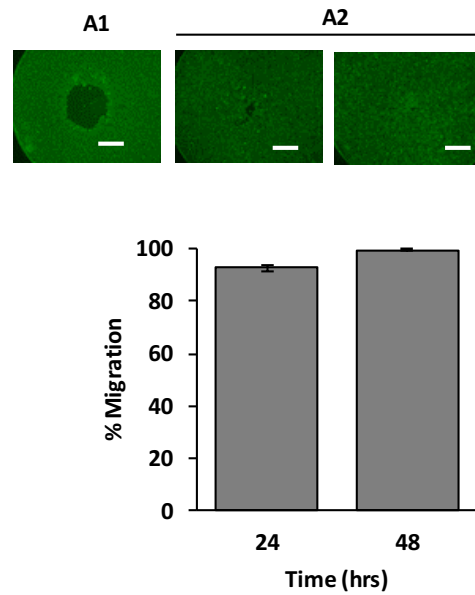

**Supplementary Figure S2.** Basal-like HCC1937 cells migrated into and occupied the gap almost within 24 hrs. Scale bar is 1 mm.

(a) Fisetin treatments

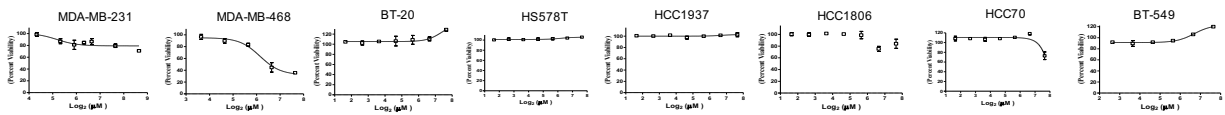

(b) Quercetin treatments

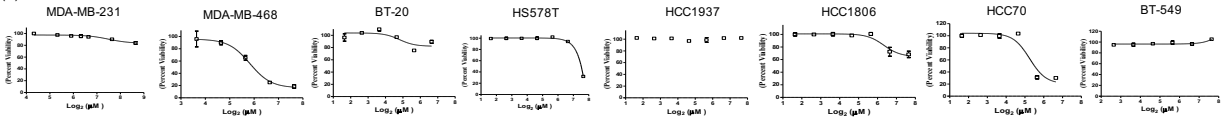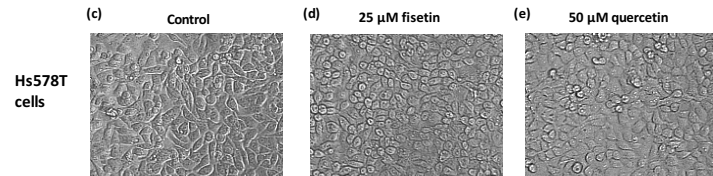

**Supplementary Figure S3.** Cytotoxicity analysis TNBC cells treated with (a) fisetin and (b) quercetin. Each data point represents the mean of 8 samples and error bars represent standard error from the mean. (c-e) Representative images of Hs578T show that the spindle-like mesenchymal morphology of cells changes to epithelial cell morphology with fisetin and quercetin treatments. Note that with fisetin treatment of HCC1806 cells and quercetin treatment of HCC1937 cells, a sigmoidal curve could not be fitted to the dose response data.

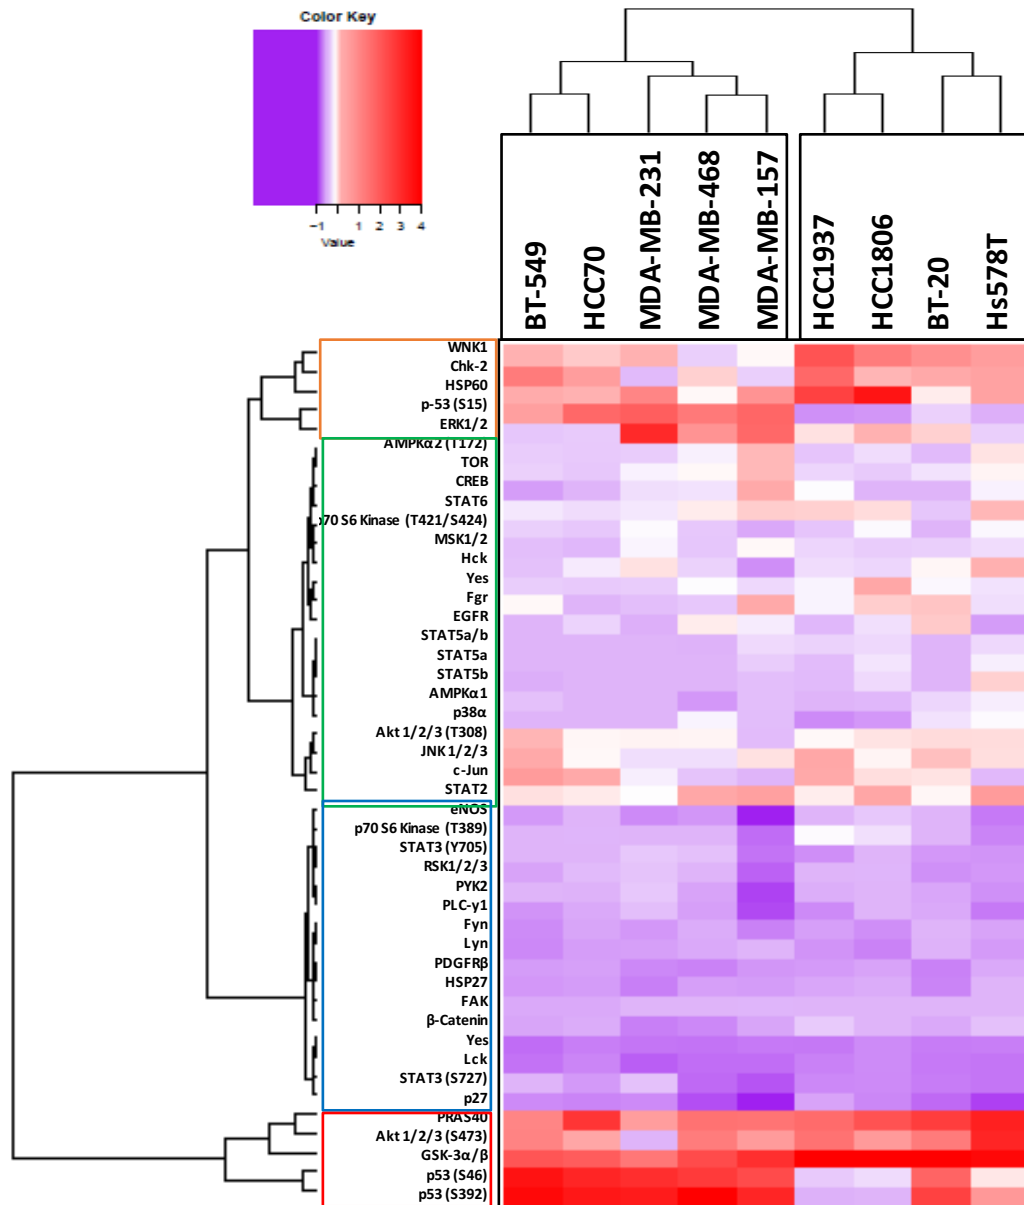

**Supplementary Figure S4.** Baseline relative phosphorylation of 43 protein kinases and 2 related signaling proteins in nine TNBC cell lines without any treatments. The hierarchical clustering identified 4 major clusters: Cluster 1 is highlighted with a red box (high baseline activity), Cluster 2 is highlighted with an orange box (high to moderate baseline activity), Cluster 3 is highlighted with a green box (moderate baseline activity), and Cluster 4 is highlighted with blue box (low baseline activity).

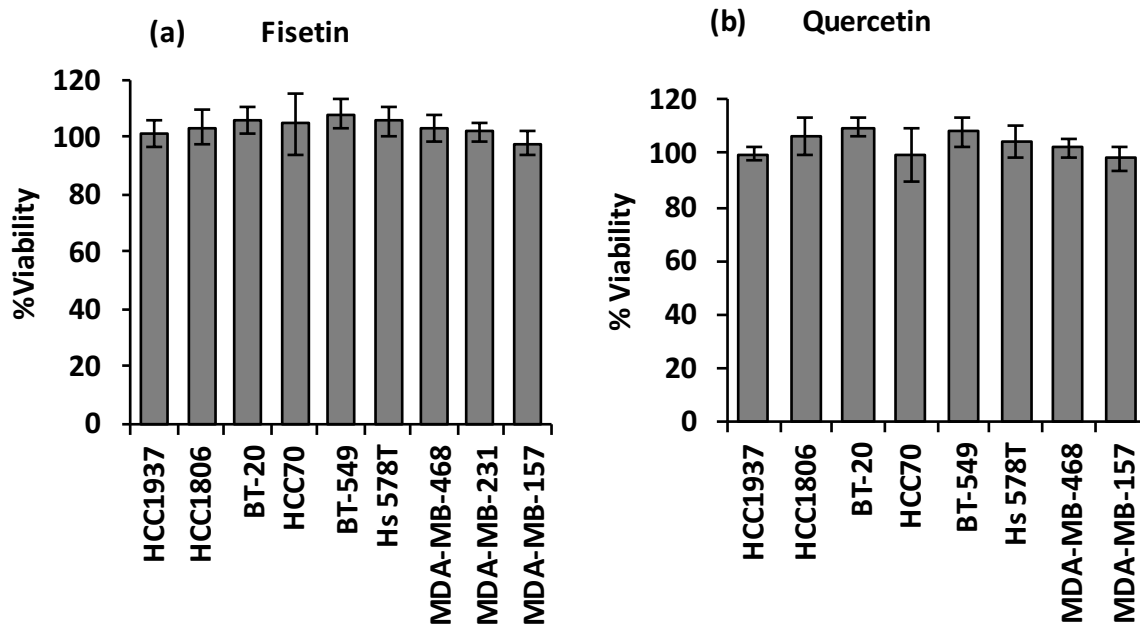

**Supplementary Figure S5.** Fisetin and quercetin treatments are non-cytotoxic to TNBC cells. Viability of nine TNBC cell lines after treatments with (a) 200  $\mu$ M fisetin and (b) 200  $\mu$ M quercetin for 6 hours.

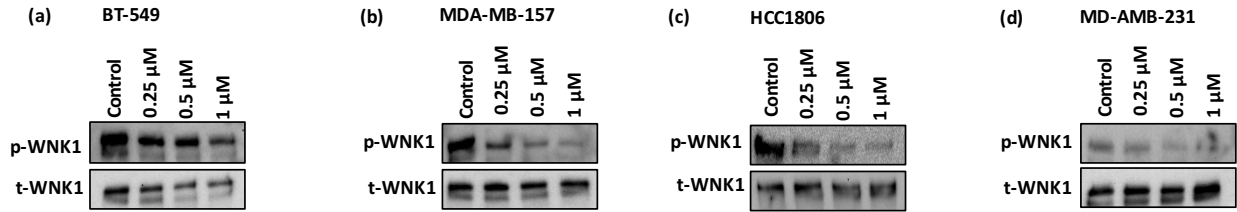

**Supplementary Figure S6.** GSK1059615 treatment dose-dependently downregulated p-WNK1. (a-d) Western blots of p-WNK1 and t-WNK in TNBC cells treated with GSK1059615 for 6 hrs.

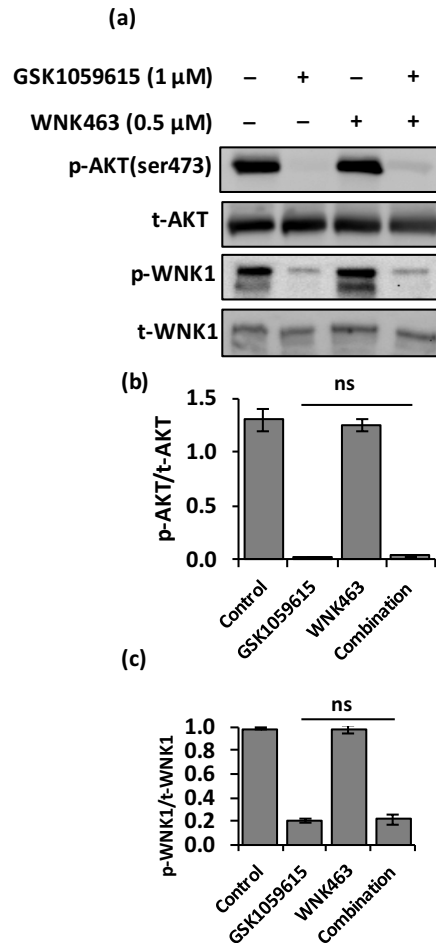

**Supplementary Figure S7.** Combination treatment of TNBC cells with GSK1059615 and WNK463 inhibitors produced an additive effect, suggesting that p-WNK1 is a p-AKT effector. (a) Western blot for single agent and combination treatments for 6 hrs. (b-c) Levels of p-AKT/t-AKT and p-WNK1/t-WNK1 in HCC1806 cells, respectively. ns represents lack of statistically significant difference.

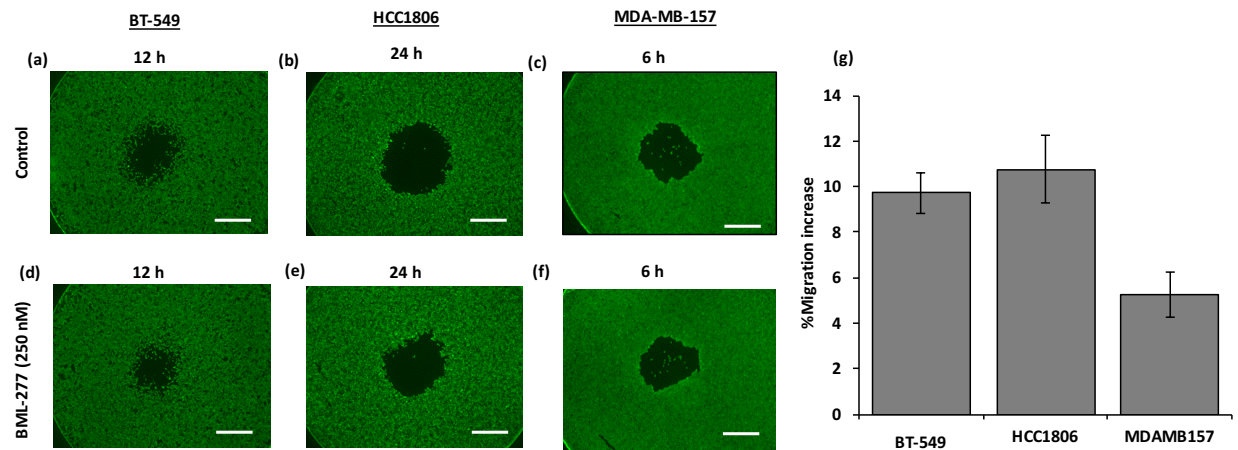

**Supplementary Figure S8.** CHK2 inhibition promoted migration of different TNBC cells. Images of cell migration (a-c) without any treatment and (d-f) treatments with BML-277. Scale bar is 1 mm. (g) Quantified increased migration of TNBC cells by CHK2 inhibition. Each bar represents a mean of 8 samples, and error bars represent standard error from mean.
